# Supplementary material for: Different Thrombus Histology in a Cancer Patient with Deep Vein Thrombosis and Recurrent Strokes
Source: PubMed Central journal article supplement — J Stroke. 2022 May 31;24(2):300–2. doi: 10.5853/jos.2021.04140 (PMC9194546; doi:10.5853/jos.2021.04140), 2022-05-31
Supplement: jos-2021-04140-suppl1.pdf [file jos-2021-04140-suppl1.pdf]

## Supplementary Methods

Images of stained thrombi were acquired using a Stereo Investigator Imaging System (MBF Bioscience, Williston, VT, USA) equipped with a light microscope (Axio Imager D2, Carl Zeiss Co. Ltd., Jena, Germany). First, a contour was manually drawn to encircle the entire thrombus at low magnification (50×). Then, the image was acquired using the Virtual Slice module at a higher magnification (200×). The virtual slice module uses a

motorized stage to automatically collect a series of contiguous images of a specimen and merge them into a single image montage of the entire thrombus.

Imaging analysis was performed semi-automatically using the color deconvolution program in ImageJ. The pixel density was determined at a threshold value of 160 for all the measurements. Then, the fraction (%) of each component (platelets, erythrocytes, and fibrin) was calculated as the pixel density percentage of the entire thrombus area.
