# Supplementary material for: Different Thrombus Histology in a Cancer Patient with Deep Vein Thrombosis and Recurrent Strokes
Source: PubMed Central journal article supplement — J Stroke. 2022 May 31;24(2):300–2. doi: 10.5853/jos.2021.04140 (PMC9194546; doi:10.5853/jos.2021.04140), 2022-05-31
Supplement: jos-2021-04140-suppl2.pdf [file jos-2021-04140-suppl2.pdf]

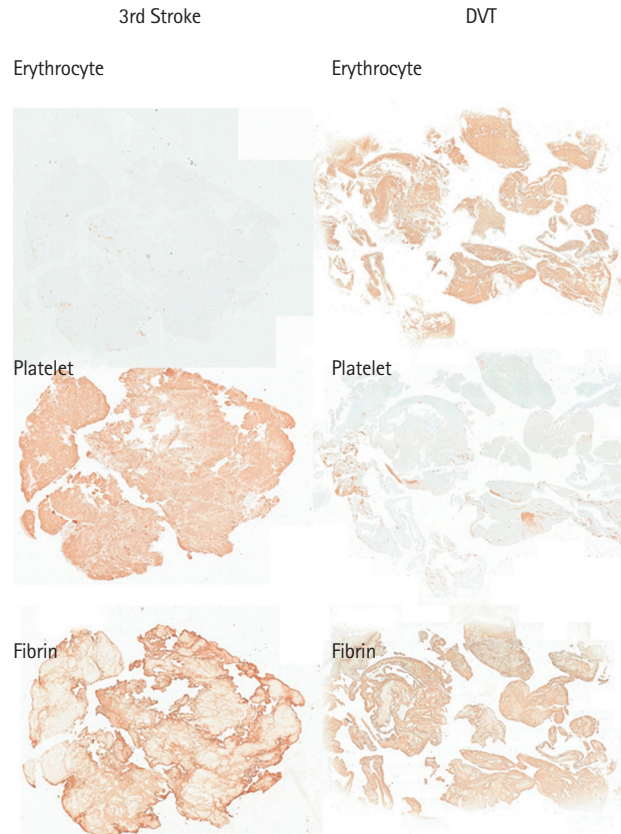

**Supplementary Figure 1.** A representative immunohistochemistry of arterial and venous thrombi. DVT, deep vein thrombosis.

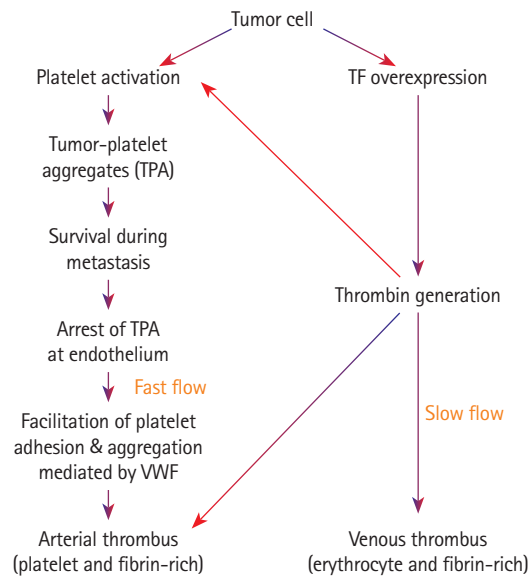

**Supplementary Figure 2.** A diagram showing the mechanism of arterial and venous thrombosis in cancer. TF, tissue factor; vWF, von Willebrand factor.
